# Supplementary material for: The analysis of glutamate and glutamine frequencies in human proteins as marker of tissue oxygenation
Source: R Soc Open Sci. 2019 Apr 10;6(4):181891. doi: 10.1098/rsos.181891 (PMC6502398; doi:10.1098/rsos.181891)
Supplement: Supplementary Table S1 [file rsos181891supp1.xlsx]

## Sheet: Foglio1
Region	Protein	ID UNIPROT	GLU/GLN (%)	GLU (%)	GLN (%)
Upstream	Protein AF1q	AF1Q_HUMAN	2333	0.078	0.033
Upstream	AF1Q protein (Myeloid/lymphoid or mixed-lineage leukemia (Trithorax homolog, Drosophila) translocated to, 11) (cDNA FLJ31527 fis, clone NT2RI2000344, highly similar to Protein AF1q) (Fragment)	Q6FGF7_HUMAN	2333	0.078	0.033
Upstream	GA-binding protein subunit beta-2	Q5SZG2_HUMAN	1826	0.102	0.056
Upstream	GA-binding protein subunit beta-2 (GABP subunit beta-2) (GABPB-2)	GABP2_HUMAN	1792	0.096	0.054
Upstream	Semaphorin-6C (Semaphorin-Y) (Sema Y)	SEM6C_HUMAN	1324	0.048	0.037
Upstream	LysM and putative peptidoglycan-binding domain-containing protein 1	LYSM1_HUMAN	1583	0.084	0.053
Upstream	Tumor necrosis factor alpha-induced protein 8-like protein 2 (TIPE2) (TNF alpha-induced protein 8-like protein 2) (TNFAIP8-like protein 2) (Inflammation factor protein 20)	TP8L2_HUMAN	2167	0.071	0.033
Upstream	Sodium channel modifier 1	SCNM1_HUMAN	2111	0.083	0.039
Upstream	Tropomodulin-4 (Skeletal muscle tropomodulin) (Sk-Tmod)	TMOD4_HUMAN	1864	0.119	0.064
Upstream	Vacuolar protein sorting-associated protein 72 homolog (Protein YL-1) (Transcription factor-like 1)	VPS72_HUMAN	2786	0.107	0.038
Upstream	Phosphatidylinositol 4-phosphate 5-kinase type-1 alpha	A6PW57_HUMAN	1600	0.058	0.036
Upstream	Phosphatidylinositol 4-phosphate 5-kinase type-1 alpha (PIP5K1-alpha) (PtdIns(4)P-5-kinase 1 alpha) (EC 2.7.1.68) (68 kDa type I phosphatidylinositol 4-phosphate 5-kinase alpha) (Phosphatidylinositol 4-phosphate 5-kinase type I alpha) (PIP5KIalpha)	PI51A_HUMAN	1571	0.059	0.037
Upstream	26S proteasome non-ATPase regulatory subunit 4 (26S proteasome regulatory subunit RPN10) (26S proteasome regulatory subunit S5A) (Antisecretory factor 1) (AF) (ASF) (Multiubiquitin chain-binding protein)	PSMD4_HUMAN	2059	0.093	0.045
Upstream	26S proteasome non-ATPase regulatory subunit 4 (Proteasome (Prosome, macropain) 26S subunit, non-ATPase, 4, isoform CRA_b)	Q5VWC4_HUMAN	2118	0.095	0.045
Upstream	Zinc finger protein 687	ZN687_HUMAN	1388	0.055	0.040
Upstream	Phosphatidylinositol 4-kinase beta	A0A0B4J1S8_HUMAN	1488	0.074	0.050
Upstream	Phosphatidylinositol 4-kinase beta (PI4K-beta) (PI4Kbeta) (PtdIns 4-kinase beta) (EC 2.7.1.67) (NPIK) (PI4K92)	PI4KB_HUMAN	1463	0.074	0.050
Upstream	DNA-binding protein RFX5 (Regulatory factor X 5)	RFX5_HUMAN	2043	0.076	0.037
Upstream	Selenium-binding protein 1 (56 kDa selenium-binding protein) (SBP56) (SP56)	SBP1_HUMAN	1529	0.055	0.036
Upstream	Epididymis secretory sperm binding protein Li 134P	V9HWG1_HUMAN	1529	0.055	0.036
Upstream	Proteasome subunit beta type (EC 3.4.25.1)	A0A140VK46_HUMAN	1667	0.057	0.034
Upstream	Proteasome subunit beta type-4 (EC 3.4.25.1) (26 kDa prosomal protein) (HsBPROS26) (PROS-26) (Macropain beta chain) (Multicatalytic endopeptidase complex beta chain) (Proteasome beta chain) (Proteasome chain 3) (HsN3)	PSB4_HUMAN	1667	0.057	0.034
Upstream	Pogo transposable element with ZNF domain (Suppressor of hairy wing homolog 5) (Zinc finger protein 280E) (Zinc finger protein 635)	POGZ_HUMAN	1024	0.062	0.060
Upstream	Cingulin	CING_HUMAN	1424	0.140	0.099
Upstream	cDNA FLJ58031, highly similar to Tuftelin	B7Z4Y1_HUMAN	1594	0.125	0.078
Upstream	Tuftelin	TUFT1_HUMAN	1600	0.123	0.077
Upstream	Sorting nexin-27	SNX27_HUMAN	1880	0.087	0.046
Upstream	Trinucleotide repeat containing 4 variant (Fragment)	Q59G45_HUMAN	0.265	0.029	0.111
Upstream	CUGBP Elav-like family member 3 (CELF-3) (Bruno-like protein 1) (CAG repeat protein 4) (CUG-BP- and ETR-3-like factor 3) (ELAV-type RNA-binding protein 1) (ETR-1) (Expanded repeat domain protein CAG/CTG 4) (RNA-binding protein BRUNOL-1) (Trinucleotide repeat-containing gene 4 protein)	CELF3_HUMAN	0.340	0.037	0.108
Upstream	RIIa domain-containing protein 1	RIAD1_HUMAN	1400	0.076	0.054
Upstream	39S ribosomal protein L9, mitochondrial	Q5SZR1_HUMAN	2222	0.086	0.039
Upstream	39S ribosomal protein L9, mitochondrial (L9mt) (MRP-L9)	RM09_HUMAN	2556	0.086	0.034
Upstream	Ornithine decarboxylase antizyme 3	A0A0G2JH29_HUMAN	1273	0.074	0.058
Upstream	Ornithine decarboxylase antizyme 3	H0Y7Y4_HUMAN	1333	0.079	0.059
Upstream	Ornithine decarboxylase antizyme 3 (AZ3) (ODC-Az 3)	OAZ3_HUMAN	1364	0.064	0.047
Upstream	cDNA FLJ54003, highly similar to Tudor and KH domain-containing protein	B4DJ68_HUMAN	3750	0.089	0.024
Upstream	Tudor and KH domain-containing protein (Tudor domain-containing protein 2)	TDRKH_HUMAN	2737	0.093	0.034
Upstream	Leucine-rich repeat and immunoglobulin-like domain-containing nogo receptor-interacting protein 4 (Leucine-rich repeat neuronal protein 6D)	LIGO4_HUMAN	1050	0.035	0.034
Upstream	RAR-related orphan nuclear receptor variant 2	F1D8P6_HUMAN	1057	0.074	0.070
Upstream	Nuclear receptor ROR-gamma (Nuclear receptor RZR-gamma) (Nuclear receptor subfamily 1 group F member 3) (RAR-related orphan receptor C) (Retinoid-related orphan receptor-gamma)	RORG_HUMAN	1027	0.073	0.071
Upstream	RAR-related orphan receptor C (RORC protein)	Q6I9R9_HUMAN	1027	0.073	0.071
Upstream	C2 calcium-dependent domain-containing protein 4D	C2D4D_HUMAN	1857	0.037	0.020
Upstream	Acyl-coenzyme A thioesterase THEM5 (Acyl-CoA thioesterase THEM5) (EC 3.1.2.2) (Acyl-coenzyme A thioesterase 15) (Thioesterase superfamily member 5)	ACO15_HUMAN	1077	0.057	0.053
Upstream	cDNA FLJ78382, highly similar to Homo sapiens C-terminal modulator protein, transcript variant 2,mRNA	A8K0C9_HUMAN	3000	0.056	0.019
Upstream	Acyl-coenzyme A thioesterase THEM4 (Acyl-CoA thioesterase THEM4) (EC 3.1.2.2) (Carboxyl-terminal modulator protein) (Thioesterase superfamily member 4)	THEM4_HUMAN	1750	0.058	0.033
Upstream	Protein S100-A10 (Calpactin I light chain) (Calpactin-1 light chain) (Cellular ligand of annexin II) (S100 calcium-binding protein A10) (p10 protein) (p11)	S10AA_HUMAN	1200	0.062	0.052
Upstream	Protein S100-A11 (Calgizzarin) (Metastatic lymph node gene 70 protein) (MLN 70) (Protein S100-C) (S100 calcium-binding protein A11) [Cleaved into: Protein S100-A11, N-terminally processed]	S10AB_HUMAN	1500	0.057	0.038
Upstream	Protein S100 (S100 calcium-binding protein)	V9HWH9_HUMAN	1500	0.057	0.038
Upstream	Trichohyalin-like protein 1 (Basalin) (Protein S100-A17) (S100 calcium-binding protein A17)	TCHL1_HUMAN	1410	0.129	0.092
Upstream	Trichohyalin	TRHY_HUMAN	1494	0.271	0.181
EDC	Repetin	RPTN_HUMAN	0.289	0.056	0.194
EDC	Hornerin	HORN_HUMAN	0.284	0.027	0.094
EDC	Filaggrin	FILA_HUMAN	0.698	0.063	0.090
EDC	Filaggrin-2 (FLG-2) (Intermediate filament-associated and psoriasis-susceptibility protein) (Ifapsoriasin)	FILA2_HUMAN	0.475	0.049	0.102
EDC	Cornulin (53 kDa putative calcium-binding protein) (53 kDa squamous epithelial-induced stress protein) (58 kDa heat shock protein) (Squamous epithelial heat shock protein 53) (Tumor-related protein)	CRNN_HUMAN	0.629	0.089	0.141
EDC	Late cornified envelope protein 5A (Late envelope protein 18) (Small proline-rich-like epidermal differentiation complex protein 5A)	LCE5A_HUMAN	0.091	0.008	0.093
EDC	Cysteine-rich C-terminal protein 1 (Protein NICE-1)	CRCT1_HUMAN	0.000	0.000	0.061
EDC	Late cornified envelope protein 3E (Late envelope protein 17)	LCE3E_HUMAN	0.111	0.011	0.098
EDC	Late cornified envelope protein 3D (Late envelope protein 16) (Small proline-rich-like epidermal differentiation complex protein 6A) (Small proline-rich-like epidermal differentiation complex protein 6B)	LCE3D_HUMAN	0.100	0.011	0.109
EDC	Late cornified envelope protein 3C (Late envelope protein 15) (Small proline-rich-like epidermal differentiation complex protein 3A)	LCE3C_HUMAN	0.091	0.011	0.117
EDC	Late cornified envelope protein 3B (Late envelope protein 14)	LCE3B_HUMAN	0.100	0.011	0.105
EDC	Late cornified envelope protein 3A (Late envelope protein 13)	LCE3A_HUMAN	0.100	0.011	0.112
EDC	Late cornified envelope protein 2D (Late envelope protein 12) (Small proline-rich-like epidermal differentiation complex protein 1A)	LCE2D_HUMAN	0.250	0.018	0.073
EDC	Late cornified envelope protein 2C (Late envelope protein 11)	LCE2C_HUMAN	0.250	0.018	0.073
EDC	Late cornified envelope protein 2B (Late envelope protein 10) (Skin-specific protein Xp5) (Small proline-rich-like epidermal differentiation complex protein 1B)	LCE2B_HUMAN	0.250	0.018	0.073
EDC	Late cornified envelope protein 2A (Late envelope protein 9)	LCE2A_HUMAN	0.250	0.019	0.075
EDC	Late cornified envelope protein 4A (Late envelope protein 8) (Small proline-rich-like epidermal differentiation complex protein 4A)	LCE4A_HUMAN	0.125	0.010	0.081
EDC	Skin-specific protein 32	XP32_HUMAN	0.083	0.008	0.096
EDC	Keratinocyte proline-rich protein (hKPRP)	KPRP_HUMAN	0.484	0.054	0.111
EDC	Late cornified envelope protein 1F (Late envelope protein 6)	LCE1F_HUMAN	0.000	0.000	0.076
EDC	Late cornified envelope protein 1E (Late envelope protein 5)	LCE1E_HUMAN	0.000	0.000	0.076
EDC	Late cornified envelope protein 1D (Late envelope protein 4)	LCE1D_HUMAN	0.000	0.000	0.079
EDC	Late cornified envelope protein 1C (Late envelope protein 3)	LCE1C_HUMAN	0.000	0.000	0.076
EDC	Late cornified envelope protein 1B (Late envelope protein 2) (Small proline-rich-like epidermal differentiation complex protein 2A)	LCE1B_HUMAN	0.000	0.000	0.076
EDC	Late cornified envelope protein 1A (Late envelope protein 1)	LCE1A_HUMAN	0.000	0.000	0.082
EDC	Late cornified envelope protein 6A	LCE6A_HUMAN	0.750	0.075	0.100
EDC	Sperm mitochondrial-associated cysteine-rich protein	MCSP_HUMAN	0.250	0.043	0.172
EDC	Sperm mitochondria-associated cysteine-rich protein (Testicular tissue protein Li 119) (Testicular tissue protein Li 161) (cDNA, FLJ92296, Homo sapiens mitochondrial capsule selenoprotein (MCSP), nucleargene encoding mitochondrial protein, mRNA)	Q5T7P5_HUMAN	0.250	0.043	0.172
EDC	Involucrin	INVO_HUMAN	0.773	0.198	0.256
EDC	Small proline-rich protein 4	SPRR4_HUMAN	0.043	0.013	0.291
EDC	Cornifin-A (19 kDa pancornulin) (SPRK) (Small proline-rich protein IA) (SPR-IA)	SPR1A_HUMAN	0.353	0.067	0.191
EDC	Small proline-rich protein 3 (22 kDa pancornulin) (Cornifin beta) (Esophagin)	SPRR3_HUMAN	0.765	0.077	0.101
EDC	Cornifin-B (14.9 kDa pancornulin) (Small proline-rich protein IB) (SPR-IB)	SPR1B_HUMAN	0.375	0.067	0.180
EDC	Small proline-rich protein 2D (SPR-2D) (Small proline-rich protein II) (SPR-II)	SPR2D_HUMAN	0.167	0.028	0.167
EDC	Small proline-rich protein 2A (SPR-2A) (2-1)	SPR2A_HUMAN	0.167	0.028	0.167
EDC	Small proline-rich protein 2B (SPR-2B)	SPR2B_HUMAN	0.167	0.028	0.167
EDC	Small proline-rich protein 2E (SPR-2E) (Small proline-rich protein II) (SPR-II)	SPR2E_HUMAN	0.167	0.028	0.167
EDC	Small proline-rich protein 2F (SPR-2F)	SPR2F_HUMAN	0.167	0.028	0.167
EDC	Small proline-rich protein 2G (SPR-2G)	SPR2G_HUMAN	0.300	0.041	0.137
EDC	Late cornified envelope-like proline-rich protein 1 (Novel small proline-rich protein)	LELP1_HUMAN	1200	0.061	0.051
EDC	Proline-rich protein 9	PRR9_HUMAN	0.522	0.103	0.198
EDC	Loricrin	LORI_HUMAN	0.000	0.000	0.045
EDC	Peptidoglycan recognition protein 3 (Peptidoglycan recognition protein I-alpha) (PGLYRPIalpha) (PGRP-I-alpha) (Peptidoglycan recognition protein intermediate alpha)	PGRP3_HUMAN	0.550	0.032	0.059
EDC	Peptidoglycan recognition protein 4 (Peptidoglycan recognition protein I-beta) (PGLYRPIbeta) (PGRP-I-beta) (Peptidoglycan recognition protein intermediate beta)	PGRP4_HUMAN	0.650	0.035	0.054
Downstream	Protein S100-A9 (Calgranulin-B) (Calprotectin L1H subunit) (Leukocyte L1 complex heavy chain) (Migration inhibitory factor-related protein 14) (MRP-14) (p14) (S100 calcium-binding protein A9)	S10A9_HUMAN	2800	0.123	0.044
Downstream	Protein S100-A12 (CGRP) (Calcium-binding protein in amniotic fluid 1) (CAAF1) (Calgranulin-C) (CAGC) (Extracellular newly identified RAGE-binding protein) (EN-RAGE) (Migration inhibitory factor-related protein 6) (MRP-6) (p6) (Neutrophil S100 protein) (S100 calcium-binding protein A12) [Cleaved into: Calcitermin]	S10AC_HUMAN	1500	0.098	0.065
Downstream	Protein S100-A8 (Calgranulin-A) (Calprotectin L1L subunit) (Cystic fibrosis antigen) (CFAG) (Leukocyte L1 complex light chain) (Migration inhibitory factor-related protein 8) (MRP-8) (p8) (S100 calcium-binding protein A8) (Urinary stone protein band A) [Cleaved into: Protein S100-A8, N-terminally processed]	S10A8_HUMAN	4500	0.097	0.022
Downstream	Protein S100-A7A (S100 calcium-binding protein A15) (S100 calcium-binding protein A7-like 1) (S100 calcium-binding protein A7A)	S1A7A_HUMAN	2000	0.059	0.030
Downstream	Protein S100-A7 (Psoriasin) (S100 calcium-binding protein A7)	S10A7_HUMAN	2000	0.059	0.030
Downstream	Protein S100-A6 (Calcyclin) (Growth factor-inducible protein 2A9) (MLN 4) (Prolactin receptor-associated protein) (PRA) (S100 calcium-binding protein A6)	S10A6_HUMAN	1800	0.100	0.056
Downstream	Protein S100-A5 (Protein S-100D) (S100 calcium-binding protein A5)	S10A5_HUMAN	11000	0.120	0.011
Downstream	Protein S100-A4 (Calvasculin) (Metastasin) (Placental calcium-binding protein) (Protein Mts1) (S100 calcium-binding protein A4)	S10A4_HUMAN	3333	0.099	0.030
Downstream	Protein S100-A3 (Protein S-100E) (S100 calcium-binding protein A3)	S10A3_HUMAN	2200	0.109	0.050
Downstream	Protein S100-A2 (CAN19) (Protein S-100L) (S100 calcium-binding protein A2)	S10A2_HUMAN	1667	0.102	0.061
Downstream	Protein S100-A16 (Aging-associated gene 13 protein) (Protein S100-F) (S100 calcium-binding protein A16)	S10AG_HUMAN	1600	0.078	0.049
Downstream	Protein S100-A14 (S100 calcium-binding protein A14) (S114)	S10AE_HUMAN	2600	0.125	0.048
Downstream	Protein S100-A13 (S100 calcium-binding protein A13)	S10AD_HUMAN	3250	0.133	0.041
Downstream	Protein S100 (S100 calcium-binding protein) (Fragment)	A0A0S2Z4H2_HUMAN	4000	0.128	0.032
Downstream	Protein S100-A1 (S-100 protein alpha chain) (S-100 protein subunit alpha) (S100 calcium-binding protein A1)	S10A1_HUMAN	4000	0.128	0.032
Downstream	Chromatin target of PRMT1 protein	A0A087X1B7_HUMAN	0.182	0.026	0.145
Downstream	Chromatin target of PRMT1 protein (Friend of PRMT1 protein) (Small arginine- and glycine-rich protein) (SRAG)	CHTOP_HUMAN	0.278	0.020	0.073
Downstream	SNARE-associated protein Snapin (Biogenesis of lysosome-related organelles complex 1 subunit 7) (BLOC-1 subunit 7) (Synaptosomal-associated protein 25-binding protein) (SNAP-associated protein)	SNAPN_HUMAN	1286	0.066	0.051
Downstream	Interleukin enhancer-binding factor 2 (cDNA FLJ51660, highly similar to Interleukin enhancer-binding factor 2)	B4DY09_HUMAN	2400	0.102	0.043
Downstream	NF45	F4ZW62_HUMAN	2467	0.095	0.038
Downstream	Interleukin enhancer-binding factor 2 (Nuclear factor of activated T-cells 45 kDa)	ILF2_HUMAN	2467	0.095	0.038
Downstream	Interleukin enhancer binding factor 2 variant (Fragment)	Q53FG3_HUMAN	2467	0.095	0.038
Downstream	Guanylate cyclase (EC 4.6.1.2)	A0A140VJE6_HUMAN	2000	0.070	0.035
Downstream	Atrial natriuretic peptide receptor 1 (EC 4.6.1.2) (Atrial natriuretic peptide receptor type A) (ANP-A) (ANPR-A) (NPR-A) (Guanylate cyclase A) (GC-A)	ANPRA_HUMAN	2000	0.070	0.035
Downstream	Integrator complex subunit 3 (Int3) (SOSS complex subunit A) (Sensor of single-strand DNA complex subunit A) (SOSS-A) (Sensor of ssDNA subunit A)	INT3_HUMAN	1518	0.081	0.054
Downstream	Long-chain fatty acid transport protein 3 (FATP-3) (Fatty acid transport protein 3) (EC 6.2.1.-) (Solute carrier family 27 member 3) (Very long-chain acyl-CoA synthetase homolog 3) (VLCS-3)	S27A3_HUMAN	1379	0.055	0.040
Downstream	Transcriptional repressor p66-beta (GATA zinc finger domain-containing protein 2B) (p66/p68)	P66B_HUMAN	0.792	0.064	0.081
Downstream	DENN domain-containing protein 4B	DEN4B_HUMAN	1384	0.068	0.049
Downstream	CREB-regulated transcription coactivator 2 (Transducer of regulated cAMP response element-binding protein 2) (TORC-2) (Transducer of CREB protein 2)	CRTC2_HUMAN	0.800	0.040	0.051
Downstream	Zinc transporter ZIP1	A0A0A0MTL8_HUMAN	7000	0.060	0.009
Downstream	Zinc transporter ZIP1 (Solute carrier family 39 member 1) (Zinc-iron-regulated transporter-like) (Zrt- and Irt-like protein 1) (ZIP-1) (hZIP1)	S39A1_HUMAN	1267	0.059	0.046
Downstream	Cyclic AMP-responsive element-binding protein 3-like protein 4 (cAMP-responsive element-binding protein 3-like protein 4) (Androgen-induced basic leucine zipper protein) (AIbZIP) (Attaching to CRE-like 1) (ATCE1) (Cyclic AMP-responsive element-binding protein 4) (CREB-4) (cAMP-responsive element-binding protein 4) (Transcript induced in spermiogenesis protein 40) (Tisp40) (hJAL) [Cleaved into: Pr…	CR3L4_HUMAN	1478	0.086	0.058
Downstream	Protein JTB (Jumping translocation breakpoint protein) (Prostate androgen-regulated protein) (PAR protein)	JTB_HUMAN	2000	0.096	0.048
Downstream	Ras-related protein Rab-13	A0A087WWB9_HUMAN	3000	0.074	0.025
Downstream	Ras-related protein Rab-13 (Cell growth-inhibiting gene 4 protein)	RAB13_HUMAN	2400	0.059	0.025
Downstream	RAB13 protein (Fragment)	Q504R6_HUMAN	2143	0.061	0.029
Downstream	40S ribosomal protein S27 (Metallopan-stimulin 1) (MPS-1)	RS27_HUMAN	1000	0.048	0.048
Downstream	Nuclear pore membrane glycoprotein 210-like (Nucleoporin 210 kDa-like) (Nucleoporin Nup210-like)	P210L_HUMAN	1276	0.059	0.046
Downstream	Tropomyosin alpha-3 chain	A0A087WWU8_HUMAN	3133	0.207	0.066
Downstream	Tropomyosin 3 isoform 1 (Fragment)	A0A0S2Z4G4_HUMAN	3250	0.210	0.065
Downstream	Tropomyosin 3 isoform 3 (Fragment)	A0A0S2Z4I4_HUMAN	3600	0.218	0.060
Downstream	cDNA FLJ50612, highly similar to Rattus norvegicus tropomyosin 3, gamma (Tpm3), transcript variant 2, mRNA	B4DQ80_HUMAN	4500	0.198	0.044
Downstream	Tropomyosin alpha-3 chain (Gamma-tropomyosin) (Tropomyosin-3) (Tropomyosin-5) (hTM5)	TPM3_HUMAN	4067	0.214	0.053
Downstream	Uncharacterized protein C1orf189	CA189_HUMAN	0.615	0.079	0.129
Downstream	Chromosome 1 open reading frame 43, isoform CRA_b (NS5ATP4A)	Q09GN0_HUMAN	1083	0.059	0.055
Downstream	Uncharacterized protein C1orf43 (Hepatitis C virus NS5A-transactivated protein 4) (HCV NS5A-transactivated protein 4) (Protein NICE-3) (S863-3)	CA043_HUMAN	1000	0.051	0.051
Downstream	Uncharacterized protein C1orf43	X6R6F3_HUMAN	1429	0.065	0.045
Downstream	Uncharacterized protein C1orf43	X6R6S3_HUMAN	0.923	0.051	0.055
Downstream	cDNA FLJ55671, highly similar to Ubiquitin-associated protein 2-like	B4DYY5_HUMAN	0.506	0.038	0.075
Downstream	Ubiquitin-associated protein 2-like	F8W726_HUMAN	0.500	0.038	0.076
